# Supplementary material for: Clinical diagnosis of EML4–ALK mutation in NSCLC by a gold nanoparticle beacon
Source: Royal Society of Chemistry journal article supplement (doi:10.1039/c6ra21230a), 2016-01-01
Supplement: c6ra21230a1.pdf [file c6ra21230a1.pdf]

Detection results of each patient

| <b>Number</b>                          | <b>1</b>  | <b>2</b>  | <b>3</b>  | <b>4</b>  | <b>5</b>  | <b>6</b>  | <b>7</b>  | <b>8</b>  | <b>9</b>  | <b>10</b> | <b>11</b> | <b>12</b> |
|----------------------------------------|-----------|-----------|-----------|-----------|-----------|-----------|-----------|-----------|-----------|-----------|-----------|-----------|
| Mean fluorescence<br>by flow cytometry | 3.99      | 4.98      | 4.23      | 20.02     | 3.94      | 5.01      | 5.12      | 2.29      | 3.02      | 4.55      | 4.23      | 3.98      |
| Relative EML4-ALK<br>expression by PCR | 0.21      | 0.18      | 0.19      | 0.85      | 0.17      | 0.26      | 0.22      | 0.12      | 0.19      | 0.23      | 0.20      | 0.21      |
| <b>Number</b>                          | <b>13</b> | <b>14</b> | <b>15</b> | <b>16</b> | <b>17</b> | <b>18</b> | <b>19</b> | <b>20</b> | <b>21</b> | <b>22</b> | <b>23</b> |           |
| Mean fluorescence<br>by flow cytometry | 5.32      | 2.99      | 4.90      | 4.78      | 4.05      | 4.07      | 5.01      | 4.88      | 3.99      | 19.81     | 4.13      |           |
| Relative EML4-ALK<br>expression by PCR | 0.27      | 0.12      | 0.17      | 0.20      | 0.20      | 0.15      | 0.18      | 0.23      | 0.18      | 0.83      | 0.18      |           |
